# Supplementary material for: Evaluation of bile salt hydrolase inhibitor efficacy for modulating host bile profile and physiology using a chicken model system
Source: PubMed Central journal article supplement (PMC7080769; doi:10.1038/s41598-020-61723-7), 2020-03-18
Supplement: 41598_2020_61723_MOESM1_ESM.pdf [file 41598_2020_61723_MOESM1_ESM.pdf]

## SUPPLEMENTAL INFORMATION

### Evaluation of bile salt hydrolase inhibitor efficacy for modulating host bile profile and physiology using a chicken model system

Wenjing Geng<sup>\$1</sup>, Sarah L. Long<sup>\$2,3</sup>, Yun-Juan Chang<sup>4</sup>, Arnold M. Saxton<sup>1</sup>,

Susan A. Joyce<sup>\*2,3</sup>, Jun Lin<sup>\*1</sup>

<sup>1</sup>Department of Animal Science, The University of Tennessee, 2506 River Drive, Knoxville, USA

<sup>2</sup>APC Microbiome Ireland, University College Cork, Cork, Ireland

<sup>3</sup>School of Biochemistry and Cell Biology, University College Cork, Cork, Ireland

<sup>4</sup>Department of High Performance Computing and Research, University of Rutgers, Newark, USA

<sup>\$</sup>These authors contributed equally to this work

**Running title:** Efficacy of bile salt hydrolase inhibitors

#### **Corresponding authors:**

Dr. Jun Lin

Department of Animal Science

The University of Tennessee

2506 River Drive

Knoxville, TN 37996-4574

Phone: (865) 974-5598. Fax: (865) 974-7297

E-mail: [jlin6@utk.edu](mailto:jlin6@utk.edu)

Dr. Susan A. Joyce

APC Microbiome Ireland

University College Cork

Cork, Ireland T12 YT20

Phone: 021 4901343

E-mail: [S.Joyce@ucc.ie](mailto:S.Joyce@ucc.ie)

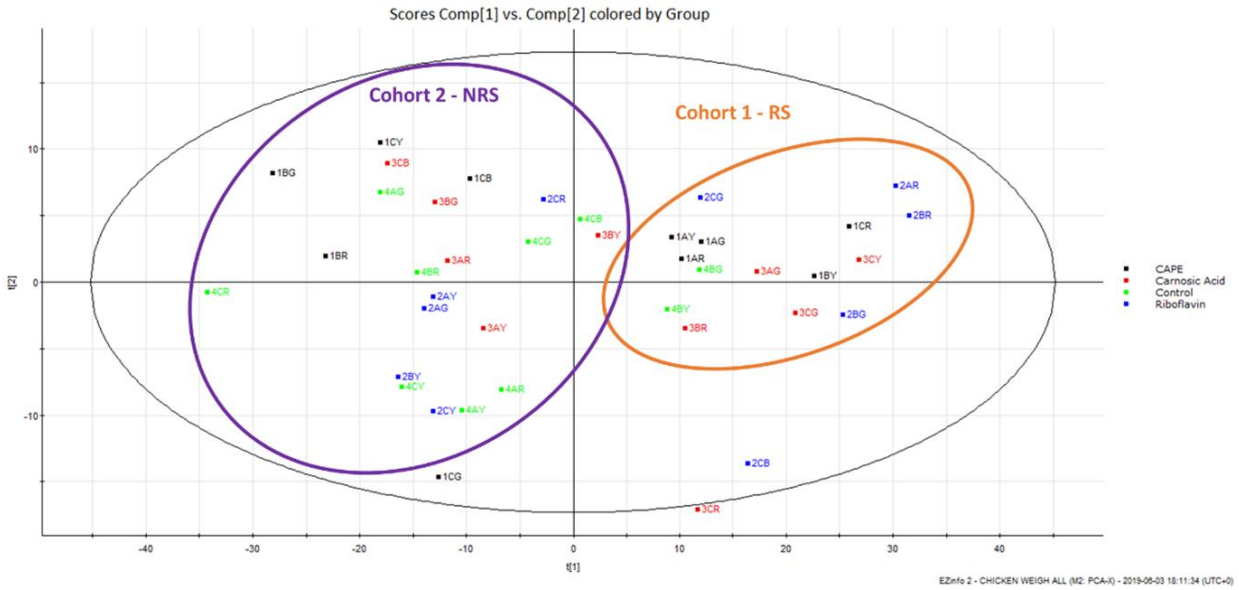

**Figure S1.** Broiler chicken body weight PCA analysis. Samples clustered into two distinct cohorts. Each point represents an individual chicken which is labelled by their corresponding study ID. Further analysis revealed that animals in cohort 1 displayed higher body weights and were designated treatment responders (RS). Cohort 2 were designated treatment non-responders (NRS) which contained animals from the Control group. PCA plot was generated using EZInfo software from Waters™.

**Table S1.** RNA sample description and mapping statistics to reference genome.

| <b>Tag name</b> | <b>Treatment <sup>a</sup></b> | <b>Concentration (ng/<math>\mu</math>L)</b> | <b>RIN</b> | <b>28S/18S</b> | <b>Number of reads in pair (raw)</b> | <b>Number of reads in pair (Q trimmed)</b> | <b>Mapping Rate (%)</b> | <b>Non-specific mapping of mapped (%)</b> |
|-----------------|-------------------------------|---------------------------------------------|------------|----------------|--------------------------------------|--------------------------------------------|-------------------------|-------------------------------------------|
| <b>Liver</b>    |                               |                                             |            |                |                                      |                                            |                         |                                           |
| LT1             | T                             | 320                                         | 8.6        | 1.9            | 26,343,666                           | 24,990,680                                 | 86.4                    | 3.4                                       |
| LT2             | T                             | 2,664                                       | 9.4        | 2.1            | 37,647,864                           | 35,569,752                                 | 86.7                    | 3.6                                       |
| LT3             | T                             | 4,328                                       | 9.2        | 1.9            | 9,188,235                            | 8,510,958                                  | 85.0                    | 3.3                                       |
| LT4             | T                             | 848                                         | 9.2        | 1.9            | 90,545,141                           | 84,666,914                                 | 68.9                    | 3.4                                       |
| LC1             | C                             | 3,576                                       | 9.2        | 2.1            | 27,499,176                           | 25,823,234                                 | 88.2                    | 3.5                                       |
| LC2             | C                             | 3,216                                       | 9.1        | 2.0            | 14,620,336                           | 13,514,440                                 | 86.4                    | 3.5                                       |
| LC3             | C                             | 4,760                                       | 9.1        | 2.1            | 36,029,297                           | 34,089,068                                 | 85.8                    | 4.1                                       |
| LC4             | C                             | 4,912                                       | 9.3        | 2.2            | 134,362,985                          | 128,352,800                                | 64.8                    | 3.8                                       |
| <b>Ileum</b>    |                               |                                             |            |                |                                      |                                            |                         |                                           |
| IT1             | T                             | 2,088                                       | 9.5        | 2.0            | 14,406,611                           | 13,461,675                                 | 82.8                    | 4.18                                      |
| IT2             | T                             | 3,424                                       | 9.6        | 2.2            | 14,867,215                           | 14,004,769                                 | 83.4                    | 4.0                                       |
| IT3             | T                             | 2,320                                       | 9.4        | 2.0            | 20,300,211                           | 18,961,626                                 | 84.1                    | 4.3                                       |
| IT4             | T                             | 1,460                                       | 8.9        | 2.0            | 29,154,179                           | 27,535,357                                 | 82.6                    | 5.5                                       |
| IC1             | C                             | 2,068                                       | 9.0        | 1.8            | 18,346,963                           | 17,380,507                                 | 83.7                    | 7.9                                       |
| IC2             | C                             | 1,524                                       | 9.3        | 1.9            | 162,762,428                          | 155,661,706                                | 61.2                    | 4.0                                       |
| IC3             | C                             | 1,476                                       | 8.6        | 1.8            | 35,944,368                           | 33,371,893                                 | 82.8                    | 4.6                                       |
| IC4             | C                             | 320                                         | 8.9        | 1.8            | 13,162,436                           | 12,258,294                                 | 82.2                    | 4.0                                       |

<sup>a</sup>T stands for treatment; C stands for control.
